# Supplementary material for: One Health Approach to Leptospirosis: Dogs as Environmental Sentinels for Identification and Monitoring of Human Risk Areas in Southern Brazil
Source: MDPI journal article supplement (doi:10.3390/tropicalmed8090435), 2023-09-06
Supplement: s1 [file s1]

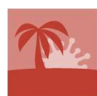

# Supplementary Materials of One Health Approach to Leptospirosis: Dogs as Environmental Sentinels for Identification and Monitoring of Human Risk Areas in Southern Brazil

**Table S1.** Associated risk factors according to confirmed and discarded cases from data contained in the Sinan Investigation Questionnaires (2007-2020) for human residents of Pinhais, Paraná state, southern Brazil (N = 403), by uni- and multivariate statistical analysis.

| Variable           |                  | Confirmed Cases |        | Discarded Cases |        | Total | %   | OR   | IC        | p-value |
|--------------------|------------------|-----------------|--------|-----------------|--------|-------|-----|------|-----------|---------|
|                    |                  | N               | % lin. | N               | % lin. |       |     |      |           |         |
| Sex                | Female           | 9               | 6.62   | 127             | 93.38  | 136   | 100 | Ref  | -         | -       |
|                    | Male             | 53              | 21.9   | 189             | 78.1   | 242   | 100 | 3.96 | 1.89-8.31 | <0.001  |
|                    | White            | 45              | 16.92  | 221             | 83.08  | 266   | 100 | Ref  | -         | -       |
|                    | Yellow           | 0               | 0      | 5               | 100    | 5     | 100 | -    | -         | 0.314   |
| Ethnicity          | Brown            | 10              | 20.83  | 38              | 79.17  | 48    | 100 | 1.29 | 0.6-2.78  | 0.511   |
|                    | Black            | 2               | 8.7    | 21              | 91.3   | 23    | 100 | 0.46 | 0.11-2.07 | 0.305   |
|                    | No Filling       | 5               | 13.89  | 31              | 86.11  | 36    | 100 | 0.79 | 0.29-2.15 | 0.646   |
|                    | Illiterate *     | 0               | 0      | 5               | 100    | 5     | 100 | 0    | -         | 0.206   |
| Education          | Elementary       | 24              | 24.49  | 74              | 75.51  | 98    | 100 | Ref  | -         | -       |
|                    | High school      | 8               | 12.70  | 55              | 87.30  | 63    | 100 | 0.45 | 0.18-1.07 | 0.067   |
|                    | Higher education | 1               | 11.11  | 8               | 88.89  | 9     | 100 | 0.39 | 0.04-3.24 | 0.364   |
|                    | Not applicable   | 0               | 0      | 19              | 100    | 19    | 100 | 0    | -         | 0.015   |
|                    | No Filling       | 29              | 15.76  | 155             | 84.24% | 184   | 100 | 0.58 | 0.31-1.06 | 0.074   |
| Flood water or mud | No               | 24              | 11.27  | 189             | 88.73  | 213   | 100 | Ref  | -         | -       |
|                    | Yes              | 33              | 23.24  | 109             | 76.76  | 142   | 100 | 2.38 | 1.34-4.24 | 0.003   |
|                    | No Filling       | 5               | 21.74  | 18              | 78.26  | 23    | 100 | 2.19 | 0.74-6.43 | 0.146   |
| Animal husbandry   | No               | 47              | 15.36  | 259             | 84.64  | 306   | 100 | Ref  | -         | -       |

|                                   |            |    |       |     |       |     |     |      |           |        |
|-----------------------------------|------------|----|-------|-----|-------|-----|-----|------|-----------|--------|
|                                   | Yes        | 9  | 20.45 | 35  | 79.55 | 44  | 100 | 1.42 | 0.64-3.14 | 0.389  |
|                                   | No Filling | 6  | 21.43 | 22  | 78.57 | 28  | 100 | 1.5  | 0.58-3.9  | 0.4    |
|                                   | No         | 55 | 16.47 | 279 | 83.53 | 334 | 100 | Ref  | -         | -      |
| Water tank                        | Yes        | 1  | 6.67  | 14  | 93.33 | 15  | 100 | 0.36 | 0.05-2.81 | 0.312  |
|                                   | No Filling | 6  | 20.69 | 23  | 79.31 | 29  | 100 | 1.32 | 0.51-3.4  | 0.56   |
|                                   | No         | 47 | 15.61 | 254 | 84.39 | 301 | 100 | Ref  | -         | -      |
| Pit, grease trap or sewer         | Yes        | 9  | 18.37 | 40  | 81.63 | 49  | 100 | 1.22 | 0.55-2.67 | 0.626  |
|                                   | No Filling | 6  | 21.43 | 22  | 78.57 | 28  | 100 | 1.47 | 0.57-3.83 | 0.423  |
|                                   | No         | 28 | 15.38 | 154 | 84.62 | 182 | 100 | Ref  | -         | -      |
| Place with rodents                | Yes        | 28 | 16.67 | 140 | 83.33 | 168 | 100 | 1.1  | 0.62-1.95 | 0.744  |
|                                   | No Filling | 6  | 21.43 | 22  | 78.57 | 28  | 100 | 1.5  | 0.56-4.03 | 0.419  |
|                                   | No         | 52 | 15.52 | 283 | 84.48 | 335 | 100 | Ref  | -         | -      |
| Planting/harvesting (cropping)    | Yes        | 3  | 25    | 9   | 75    | 12  | 100 | 1.81 | 0.48-6.93 | 0.377  |
|                                   | No Filling | 7  | 22.58 | 24  | 77.42 | 31  | 100 | 1.59 | 0.65-3.87 | 0.307  |
|                                   | No         | 37 | 13.36 | 240 | 86.64 | 277 | 100 | Ref  | -         | -      |
| <b>River, stream, pond or dam</b> | Yes        | 23 | 29.49 | 55  | 70.51 | 78  | 100 | 2.71 | 1.49-4.93 | <0.001 |
|                                   | No Filling | 2  | 8.7   | 21  | 91.3  | 23  | 100 | 0.62 | 0.14-2.74 | 0.523  |
|                                   | No         | 42 | 15.22 | 234 | 84.78 | 276 | 100 | Ref  | -         | -      |
| Contact with rodent               | Yes        | 15 | 20    | 60  | 80    | 75  | 100 | 1.39 | 0.72-2.68 | 0.319  |
|                                   | No Filling | 5  | 18.52 | 22  | 81.48 | 27  | 100 | 1.27 | 0.45-3.53 | 0.651  |
|                                   | No         | 55 | 16.08 | 287 | 83.92 | 342 | 100 | Ref  | -         | -      |
| Grain/food storage                | Yes        | 1  | 11.11 | 8   | 88.89 | 9   | 100 | 0.65 | 0.08-5.32 | 0.688  |
|                                   | No Filling | 6  | 22.22 | 21  | 77.78 | 27  | 100 | 1.49 | 0.58-3.86 | 0.408  |
|                                   | No         | 42 | 14.29 | 252 | 85.71 | 294 | 100 | Ref  | -         | -      |
| Wasteland                         | Yes        | 13 | 23.21 | 43  | 76.79 | 56  | 100 | 1.81 | 0.9-3.66  | 0.092  |
|                                   | No Filling | 7  | 25    | 21  | 75    | 28  | 100 | 2    | 0.8-5     | 0.131  |
|                                   | No         | 38 | 13.97 | 234 | 86.03 | 272 | 100 | Ref  | -         | -      |
| <b>Garbage/debris</b>             | Yes        | 19 | 23.75 | 61  | 76.25 | 80  | 100 | 1.92 | 1.03-3.56 | 0.037  |

|                                |            |    |       |     |       |     |     |      |            |        |
|--------------------------------|------------|----|-------|-----|-------|-----|-----|------|------------|--------|
|                                | No Filling | 5  | 19.23 | 21  | 80.77 | 26  | 100 | 1.47 | 0.52-4.12  | 0.466  |
|                                | No         | 10 | 10    | 90  | 90    | 100 | 100 | Ref  | -          | -      |
| <b>Fever</b>                   | Yes        | 52 | 18.84 | 224 | 81.16 | 276 | 100 | 2.09 | 1.02-4.29  | 0.041  |
|                                | Ignored    | 0  | 0     | 2   | 100   | 2   | 100 | -    | -          | 0.638  |
|                                | No         | 5  | 5.49  | 86  | 94.51 | 91  | 100 | Ref  | -          | -      |
| <b>Myalgia</b>                 | Yes        | 57 | 20.28 | 224 | 79.72 | 281 | 100 | 4.38 | 1.7-11.29  | 0.001  |
|                                | Ignored    | 0  | 0     | 6   | 100   | 6   | 100 | -    | -          | 0.555  |
|                                | No         | 20 | 16.39 | 102 | 83.61 | 122 | 100 | Ref  | -          | -      |
| Headache                       | Yes        | 41 | 16.47 | 208 | 83.53 | 249 | 100 | 1.01 | 0.56-1.8   | 0.986  |
|                                | Ignored    | 1  | 14.29 | 6   | 85.71 | 7   | 100 | 0.85 | 0.1-7.45   | 0.883  |
|                                | No         | 29 | 14.22 | 175 | 85.78 | 204 | 100 | Ref  | -          | -      |
| Prostration                    | Yes        | 31 | 19.02 | 132 | 80.98 | 163 | 100 | 1.42 | 0.81-2.47  | 0.216  |
|                                | Ignored    | 2  | 18.18 | 9   | 81.82 | 11  | 100 | 1.34 | 0.28-6.52  | 0.715  |
|                                | No         | 46 | 14.51 | 271 | 85.49 | 317 | 100 | Ref  | -          | -      |
| <b>Conjunctival congestion</b> | Yes        | 16 | 29.63 | 38  | 70.37 | 54  | 100 | 0.48 | 1.28-4.81  | 0.006  |
|                                | Ignored    | 0  | 0     | 7   | 100   | 7   | 100 | -    | -          | 0.277  |
|                                | No         | 17 | 8.95  | 173 | 91.05 | 190 | 100 | Ref  | -          | -      |
| Calf pain                      | Yes        | 44 | 24.72 | 134 | 75.28 | 178 | 100 | 3.34 | 1.83-6.11  | <0.001 |
|                                | Ignored    | 1  | 10    | 9   | 90    | 10  | 100 | 1.13 | 0.14-9.47  | <0.001 |
|                                | No         | 26 | 11.5  | 200 | 88.5  | 226 | 100 | Ref  | -          | -      |
| <b>Vomit</b>                   | Yes        | 35 | 23.97 | 111 | 76.03 | 146 | 100 | 2.43 | 1.39-4.24  | 0.002  |
|                                | Ignored    | 1  | 16.67 | 5   | 83.33 | 6   | 100 | 1.54 | 0.17-13.69 | 0.697  |
|                                | No         | 41 | 14.49 | 242 | 85.51 | 283 | 100 | Ref  | -          | -      |
| Diarrhea                       | Yes        | 20 | 22.99 | 67  | 77.01 | 87  | 100 | 1.76 | 0.97-3.21  | 0.062  |
|                                | Ignored    | 1  | 12.5  | 7   | 87.5  | 8   | 100 | 0.84 | 0.1-7.03   | 0.875  |
|                                | No         | 28 | 9.89  | 255 | 90.11 | 283 | 100 | Ref  | -          | -      |
| <b>Jaundice</b>                | Yes        | 34 | 37.78 | 56  | 62.22 | 90  | 100 | 5.53 | 3.1-9.85   | <0.001 |
|                                | Ignored    | 0  | 0     | 5   | 100   | 5   | 100 | -    | -          | 0.459  |

|                               |                          |    |       |     |       |     |     |      |            |        |
|-------------------------------|--------------------------|----|-------|-----|-------|-----|-----|------|------------|--------|
|                               | No                       | 45 | 13.39 | 291 | 86.61 | 336 | 100 | Ref  | -          | -      |
| <b>Renal insufficiency</b>    | Yes                      | 17 | 56.67 | 13  | 43.33 | 30  | 100 | 8.46 | 3.85-18.58 | <0.001 |
|                               | Ignored                  | 0  | 0     | 12  | 100   | 12  | 100 | -    | -          | 0.174  |
|                               | No                       | 48 | 14.95 | 273 | 85.05 | 321 | 100 | Ref  | -          | -      |
| <b>Respiratory alteration</b> | Yes                      | 13 | 26.53 | 36  | 73.47 | 49  | 100 | 2.05 | 1.02-4.15  | 0.042  |
|                               | Ignored                  | 1  | 12.5  | 7   | 87.5  | 8   | 100 | -    | -          | 0.847  |
|                               | No                       | 58 | 16.25 | 299 | 83.75 | 357 | 100 | Ref  | -          | -      |
| Cardiavascular alteration     | Yes                      | 2  | 22.22 | 7   | 77.78 | 9   | 100 | 1.47 | 0.3-7.27   | 0.642  |
|                               | Ignored                  | 2  | 16.67 | 10  | 83.33 | 12  | 100 | 1.03 | 0.22-4.83  | 0.969  |
|                               | No                       | 59 | 16.34 | 302 | 83.66 | 361 | 100 | Ref  | -          | -      |
| Lung hemorrhage               | Yes                      | 3  | 33.33 | 6   | 66.67 | 9   | 100 | 2.56 | 0.62-10.52 | 0.178  |
|                               | Ignored                  | 0  | 0     | 8   | 100   | 8   | 100 | -    | -          | 0.212  |
| Other hemorrhages             | No                       | 58 | 16.2  | 300 | 83.8  | 358 | 100 | Ref  | -          | -      |
|                               | Yes                      | 4  | 33.33 | 8   | 66.67 | 12  | 100 | 2.59 | 0.75-8.87  | 0.118  |
|                               | Ignored                  | 0  | 0     | 8   | 100   | 8   | 100 | -    | -          | 0.215  |
|                               | No                       | 61 | 16.62 | 306 | 83.38 | 367 | 100 | Ref  | -          | -      |
| Meningitism                   | Yes                      | 0  | 0     | 3   | 100   | 3   | 100 | -    | -          | 0.44   |
|                               | Ignored                  | 1  | 12.5  | 7   | 87.5  | 8   | 100 | 0.72 | 0.09-5.93  | 0.756  |
|                               | No                       | 44 | 15.28 | 244 | 84.72 | 288 | 100 | Ref  | -          | -      |
| Other symptoms                | Yes                      | 10 | 13.7  | 63  | 86.3  | 73  | 100 | 0.88 | 0.42-1.85  | 0.735  |
|                               | Ignored                  | 8  | 47.06 | 9   | 52.94 | 17  | 100 | 4.93 | 1.8-13.47  | <0.001 |
|                               | No                       | 20 | 9.66  | 187 | 90.34 | 207 | 100 | Ref  | -          | -      |
| <b>Hospitalization</b>        | Yes                      | 41 | 24.85 | 124 | 75.15 | 165 | 100 | 3.09 | 1.73-5.53  | <0.001 |
|                               | Ignored                  | 1  | 16.67 | 5   | 83.33 | 6   | 100 | 1.87 | 0.2-16-8   | 0.57   |
|                               | Clinical-epidemiological | 4  | 14.29 | 24  | 85.71 | 28  | 100 | Ref  | -          | -      |
| Diagnosis criteria            | Clinical-laboratory      | 58 | 16.86 | 286 | 83.14 | 344 | 100 | 1.22 | 0.4-3.64   | 0.725  |
|                               | No Filling               | 0  | 0     | 6   | 100   | 6   | 100 | -    | -          | 0.324  |
| Autochthonous **              | No                       | 13 | 81.25 | 3   | 18.75 | 16  | 100 | Ref  | -          | -      |

|           |                        |    |       |     |       |     |     |      |           |        |
|-----------|------------------------|----|-------|-----|-------|-----|-----|------|-----------|--------|
| Evolution | Yes                    | 34 | 61.82 | 21  | 38.18 | 55  | 100 | 0.37 | 0.1-1.47  | 0.148  |
|           | Indeterminate          | 15 | 71.43 | 6   | 28.57 | 21  | 100 | 0.58 | 0.12-2.78 | 0.49   |
|           | No Filling             | 0  | 0     | 286 | 100   | 286 | 100 | -    | -         | <0.001 |
|           | Healing                | 50 | 14.62 | 292 | 85.38 | 342 | 100 | Ref  | -         | -      |
|           | Ignored                | 2  | 15.38 | 11  | 84.62 | 13  | 100 | 1.06 | 0.23-4.93 | 0.939  |
|           | Death other causes     | 1  | 7.14  | 13  | 92.86 | 14  | 100 | 0.45 | 0.06-3.51 | 0.434  |
|           | Death by leptospirosis | 9  | 100   | 0   | 0     | 9   | 100 | -    | -         | <0.001 |

\* OR cannot be computed because it has zero \*\* Variable not included in multiple high hair modeling Number of “No Filling”

**Table S2.** Multiple logistic regression models by the stepwise method of input and output of Human variables.

| Variáveis                                   | Model<br>1      | Model<br>2      | Model<br>3      | Model<br>4      | Model<br>5      | Model<br>6      | Model<br>7      | Model<br>8      | Model<br>9      | Model<br>10     | Model<br>11     |
|---------------------------------------------|-----------------|-----------------|-----------------|-----------------|-----------------|-----------------|-----------------|-----------------|-----------------|-----------------|-----------------|
|                                             | <i>p</i> -value |
| Intercept                                   | <0.001          | <0.001          | <0.001          | <0.001          | <0.001          | <0.001          | <0.001          | <0.001          | <0.001          | <0.001          | <0.001          |
| <b>Sex: Male</b>                            | 0.088           | 0.060           | 0.059           | 0.055           | 0.053           | 0.048           | 0.052           | 0.067           | 0.056           | 0.044           | 0.042           |
| Illiterate                                  | 0.997           |                 |                 |                 |                 |                 |                 |                 |                 |                 |                 |
| Education: High school                      | 0.268           |                 |                 |                 |                 |                 |                 |                 |                 |                 |                 |
| Education: Higher education                 | 0.831           |                 |                 |                 |                 |                 |                 |                 |                 |                 |                 |
| Education Not applicable                    | 0.994           |                 |                 |                 |                 |                 |                 |                 |                 |                 |                 |
| Education No Filling                        | 0.282           |                 |                 |                 |                 |                 |                 |                 |                 |                 |                 |
| Risk Flood water or mud: No Filling         | 0.992           | 0.991           | 0.991           | 0.991           | 0.991           | 0.991           | 0.990           | 0.990           | 0.990           | 0.990           | 0.989           |
| Risk Flood water or mud: yes                | 0.299           | 0.185           | 0.180           | 0.185           | 0.195           | 0.191           | 0.208           | 0.194           | 0.139           | 0.105           | 0.102           |
| Risk River, stream, pond or dam: yes        | 0.201           | 0.162           | 0.159           | 0.159           | 0.159           | 0.134           | 0.184           | 0.168           |                 |                 |                 |
| Risk River, stream, pond or dam: No Filling | 0.624           | 0.663           | 0.665           | 0.668           | 0.704           | 0.896           | 0.771           | 0.687           |                 |                 |                 |
| Risk Wasteland: yes                         | 0.613           | 0.685           | 0.681           | 0.671           | 0.690           | 0.687           | 0.551           | 0.605           | 0.798           | 0.850           |                 |
| Risk Wasteland: No Filling                  | 0.342           | 0.339           | 0.338           | 0.342           | 0.334           | 0.310           | 0.229           | 0.179           | 0.086           | 0.089           |                 |
| Risk Garbage/debris: yes                    | 0.713           | 0.701           | 0.703           | 0.688           | 0.656           | 0.676           | 0.572           | 0.668           | 0.642           | 0.676           | 0.587           |
| Risk Garbage/debris: No Filling             | 0.991           | 0.991           | 0.990           | 0.990           | 0.990           | 0.990           | 0.990           | 0.990           | 0.989           | 0.989           | 0.989           |

|                                   |        |        |        |        |        |        |        |        |        |        |        |
|-----------------------------------|--------|--------|--------|--------|--------|--------|--------|--------|--------|--------|--------|
| <b>Fever: yes</b>                 | 0.093  | 0.095  | 0.094  | 0.094  | 0.090  | 0.083  | 0.100  | 0.099  | 0.099  |        |        |
| Fever: Ignored                    | 0.999  | 0.999  | 0.999  | 0.999  | 0.996  | 0.996  | 0.995  | 0.995  | 0.995  |        |        |
| Myalgia: yes                      | 0.318  | 0.278  | 0.263  | 0.265  | 0.239  | 0.220  | 0.207  | 0.177  | 0.174  | 0.063  | 0.075  |
| Myalgia: Ignored                  | 0.997  | 0.997  | 0.996  | 0.996  | 0.995  | 0.995  | 0.994  | 0.994  | 0.994  | 0.993  | 0.992  |
| Conjunctival congestion: yes      | 0.120  | 0.111  | 0.112  | 0.105  | 0.097  | 0.125  | 0.232  |        |        |        |        |
| Conjunctival congestion: Ignored  | 0.999  | 0.999  | 0.999  | 0.999  | 0.999  | 0.999  | 0.999  |        |        |        |        |
| <b>Calf pain: yes</b>             | 0.008  | 0.007  | 0.007  | 0.007  | 0.007  | 0.006  | 0.009  | 0.008  | 0.006  | 0.007  | 0.005  |
| Calf pain: Ignored                | 0.995  | 0.995  | 0.994  | 0.994  | 0.994  | 0.994  | 0.994  | 0.994  | 0.993  | 0.993  | 0.993  |
| Vomit: yes                        | 0.792  | 0.726  | 0.688  | 0.688  |        |        |        |        |        |        |        |
| Vomit : Ignored                   | 0.998  | 0.998  | 0.996  | 0.996  |        |        |        |        |        |        |        |
| Diarrhea : yes                    | 0.917  | 0.865  |        |        |        |        |        |        |        |        |        |
| Diarrhea: Ignored                 | 0.997  | 0.997  |        |        |        |        |        |        |        |        |        |
| <b>Jaundice: yes</b>              | <0.001 | <0.001 | <0.001 | <0.001 | <0.001 | <0.001 | <0.001 | <0.001 | <0.001 | <0.001 | <0.001 |
| Jaundice: Ignored                 | 0.997  | 0.997  | 1.000  | 0.999  | 0.999  | 0.999  | 0.998  | 0.998  | 0.998  | 0.997  | 0.997  |
| <b>Renal insufficiency: yes</b>   | 0.025  | 0.017  | 0.017  | 0.017  | 0.016  | 0.014  | 0.014  | 0.009  | 0.008  | 0.004  | 0.008  |
| Renal insufficiency: Ignored      | 0.998  | 0.998  | 0.998  | 0.998  | 0.998  | 0.998  | 0.998  | 0.997  | 0.997  | 0.997  | 0.997  |
| Respiratory alteration: yes       | 0.203  | 0.210  | 0.210  | 0.198  | 0.210  | 0.237  |        |        |        |        |        |
| Respiratory alteration: Ignored   | 0.996  | 0.996  | 1      | 1      | 1      | 1      |        |        |        |        |        |
| Pulmonary hemorrhage: yes         | 0.974  | 0.827  | 0.837  |        |        |        |        |        |        |        |        |
| Pulmonary hemorrhage: Ignored     | 0.998  | 0.998  | 0.998  |        |        |        |        |        |        |        |        |
| Other hemorrhages: yes            | 0.994  | 0.993  | 0.993  | 0.993  | 0.993  | 0.993  |        | 0.993  | 0.993  | 0.993  | 0.993  |
| Other hemorrhages: Ignored        | 1      | 1      | 1      | 1      | 1      | 1      |        | 1      | 1      | 1      | 1      |
| Hospitalization: yes              | 0.550  | 0.501  | 0.515  | 0.512  | 0.514  |        | 0.993  |        |        |        |        |
| Hospitalization: Ignored          | 0.564  | 0.540  | 0.542  | 0.541  | 0.551  |        | 1.000  |        |        |        |        |
| Evolution: Death other causes     | 0.544  | 0.685  | 0.672  | 0.610  | 0.594  | 0.659  | 0.661  | 0.575  | 0.536  | 0.472  | 0.503  |
| Evolution: Death by leptospirosis | 0.989  | 0.989  | 0.988  | 0.988  | 0.988  | 0.988  | 0.987  | 0.987  | 0.987  | 0.987  | 0.986  |
| Evolution: Ignored                | 0.666  | 0.797  | 0.793  | 0.792  | 0.795  | 0.780  | 0.804  | 0.865  | 0.934  | 0.812  | 0.784  |

\* OR no pode ser calculada por possuir zero

**Table S3.** Number of co-variables from Human Models and their respective AIC.

| Model    | Number de co-variables | AIC    |
|----------|------------------------|--------|
| Model 1  | 41                     | 283.52 |
| Model 2  | 36                     | 277.87 |
| Model 3  | 34                     | 273.90 |
| Model 4  | 32                     | 269.96 |
| Model 5  | 30                     | 266.13 |
| Model 6  | 28                     | 263.11 |
| Model 7  | 26                     | 260.61 |
| Model 8  | 24                     | 257.98 |
| Model 9  | 22                     | 256.33 |
| Model 10 | 20                     | 255.38 |
| Model 11 | 18                     | 255.28 |

**Table S4.** Associated risk factors for anti-*Leptospira* agglutinins (2019-2020) in dog population of of Pinhais. Paraná state. southern Brazil (N = 133). by uni- and multivariate statistical analysis.

| Variable       |                            |  | Positive |       | Negative |        | <i>p</i> -value* | OR    | IC           | <i>P</i> -value |
|----------------|----------------------------|--|----------|-------|----------|--------|------------------|-------|--------------|-----------------|
|                |                            |  | N        | lin % | N        | lin %  |                  |       |              |                 |
| Animal sex     | Female                     |  | 5        | 6.41  | 73       | 93.59  | 0.808            | 0.685 | 0.188-2.49   | 0.564           |
|                | Male                       |  | 5        | 9.09  | 50       | 90.91  |                  | Ref   | -            | -               |
| Age range      | Up to 1 year               |  | 1        | 8.33  | 11       | 91.67  | 0.961            | Ref   | -            | -               |
|                | 1 to 8 years               |  | 7        | 7.53  | 86       | 92.47  |                  | 0.895 | 0.100 -7.978 | 0.921           |
|                | Above 8 years              |  | 2        | 8.70  | 21       | 91.30  |                  | 1.048 | 0.085-12.876 | 0.971           |
| Classification | Domiciled                  |  | 9        | 7.83  | 106      | 92.17  | 1                | Ref   | -            | -               |
|                | Wandering + Semi-Domiciled |  | 1        | 5.56  | 17       | 94.44  |                  | 0.693 | 0.082-5.821  | 0.734           |
| Ethnicity      | One ethnicity              |  | 0        | 0.00  | 33       | 100.00 |                  | 0.000 | -            | 0.056           |
|                | Mixed                      |  | 1        | 10.20 | 88       | 89.80  | 0.126            | Ref   | -            | -               |
| Body score     | 1 (very thin)              |  | 0        | 0.00  | 1        | 100.00 |                  | 0.000 |              | 0.784           |

|                                                        |                    |    |       |     |        |       |       |              |       |
|--------------------------------------------------------|--------------------|----|-------|-----|--------|-------|-------|--------------|-------|
|                                                        | 2 (thin)           | 0  | 0.00  | 9   | 100.00 | 0.429 | 0.000 |              | 0.412 |
|                                                        | 3 (normal)         | 4  | 7.02  | 53  | 92.98  |       | Ref   | -            | -     |
|                                                        | 4 (fat)            | 2  | 4.88  | 39  | 95.12  |       | 0.679 | 0.118-3.899  | 0.663 |
|                                                        | 5 (very fat)       | 4  | 16.00 | 21  | 84.00  |       | 2.524 | 0.577-11.034 | 0.207 |
|                                                        | Big                | 1  | 3.45  | 28  | 96.55  |       | 0.690 | 0.069 -6.940 | 0.752 |
| Size                                                   | Average            | 6  | 13.95 | 37  | 86.05  | 0.146 | 3.135 | 0.738-13.311 | 0.106 |
|                                                        | Small              | 3  | 4.92  | 58  | 95.08  |       | Ref   | -            | -     |
|                                                        | No                 | 7  | 8.33  | 77  | 91.67  |       | Ref   | -            | -     |
| Castrated                                              | Yes                | 3  | 6.12  | 46  | 93.88  | 0.9   | 0.717 | 0.177-2.912  | 0.641 |
|                                                        | No (ref)           | 9  | 11.84 | 67  | 88.16  | 0.064 | Ref   | -            | -     |
| Dog tick collection                                    | Yes                | 1  | 1.75  | 56  | 98.25  |       | 0.133 | 0.016-1.082  | 0.029 |
|                                                        | 0                  | 10 | 12.35 | 71  | 87.65  | 0.074 |       |              |       |
|                                                        | 1 to 5             | 0  | 0     | 36  | 100    |       |       |              |       |
| Number of ticks collected from dogs                    | 6 to 10            | 0  | 0     | 4   | 100    |       |       |              |       |
|                                                        | More than 10       | 0  | 0     | 12  | 100    |       |       |              |       |
|                                                        | No (ref)           | 3  | 4.76  | 60  | 95.24  | 0.415 | Ref   | -            | -     |
| Environmental tick collection                          | Yes                | 7  | 10    | 63  | 90     |       | 2.222 | 0.549-8.993  | 0.253 |
|                                                        | 0 (ref)            | 3  | 4.76  | 60  | 95.24  | 0.123 | Ref   | -            | -     |
|                                                        | 1 to 5             | 5  | 14.29 | 30  | 85.71  |       | 3.333 | 0.746-14.893 | 0.099 |
| Number of ticks collected from the environment         | 6 to 10            | 0  | 0     | 5   | 100    |       | 0.000 |              | 0.618 |
|                                                        | 11 to 20           | 2  | 20    | 8   | 80     |       | 5.000 | 0.722-34.631 | 0.076 |
|                                                        | More than 20       | 0  | 0     | 20  | 100    |       | 0.000 |              | 0.320 |
|                                                        | Environmental      | 7  | 21.88 | 25  | 78.12  | 0.003 | Ref   | -            | -     |
| Tick collection sites (OR environment X no collection) | No tick collection | 3  | 6     | 47  | 94     |       | 0.228 | 0.054-0.959  | 0.032 |
| Dog housing location                                   | Inside home        | 0  | 0     | 3   | 100    | 0.810 |       |              |       |
|                                                        | Backyard           | 10 | 7.81  | 118 | 92.19  |       |       |              |       |
|                                                        | Street             | 0  | 0     | 2   | 100    |       |       |              |       |
|                                                        | 1                  | 2  | 11.76 | 15  | 88.24  | 0.764 | Ref   | -            | -     |



|                          |                            |    |       |     |       |       |       |              |       |
|--------------------------|----------------------------|----|-------|-----|-------|-------|-------|--------------|-------|
| Number of dogs           | 2                          | 3  | 7.69  | 36  | 92.31 |       | 0.625 | 0.095-4.128  | 0.623 |
|                          | 3 or more                  | 3  | 6.25  | 45  | 93.76 |       | 0.500 | 0.076-3.284  | 0.463 |
| Other animals            | No                         | 7  | 11.48 | 54  | 88.52 | 0.207 | 2.981 | 0.736-12.074 | 0.111 |
|                          | Yes                        | 3  | 4.17  | 69  | 95.83 |       | Ref   | -            | -     |
| Animal mobility          | Street access              | 2  | 7.69  | 24  | 92.31 | 0.611 | Ref   | -            | -     |
|                          | Dog kennel                 | 0  | 0     | 11  | 100   |       | 0     |              | 0.344 |
|                          | Released in the backyard   | 8  | 8.33  | 88  | 91.67 |       | 1.091 | 0.217-5.479  | 0.916 |
| Enter the house          | No                         | 2  | 2.99  | 65  | 97.01 | 0.095 | Ref   | -            | -     |
|                          | Yes                        | 8  | 12.12 | 58  | 87.88 |       | 4.483 | 0.915-21.969 | 0.046 |
| Access to forest         | No                         | 7  | 7.37  | 88  | 92.63 | 1     | Ref   | -            | -     |
|                          | Yes                        | 3  | 7.89  | 35  | 92.11 |       | 1.078 | 0.264-4.405  | 0.917 |
| Visualization of rodents | No                         | 2  | 3.45  | 56  | 96.55 | 0.217 | Ref   | -            | -     |
|                          | Yes                        | 8  | 10.67 | 67  | 89.33 |       | 3.343 | 0.682-16.388 | 0.117 |
|                          | Day                        | 2  | 14.29 | 12  | 85.71 | 0.345 | Ref   | -            | -     |
| Rodent viewing period    | Night                      | 3  | 7.89  | 35  | 92.11 |       | 0.514 | 0.076-3.458  | 0.488 |
|                          | Both                       | 3  | 13.04 | 20  | 86.96 |       | 0.9   | 0.131-6.182  | 0.915 |
|                          | Does not visualize         | 2  | 3.45  | 56  | 96.55 |       | 0.214 | 0.027-1.676  | 0.112 |
| Food                     | Food                       | 1  | 20    | 4   | 80    | 0.558 | 3.250 | 0.303-34.857 | 0.306 |
|                          | Portion                    | 5  | 7.14  | 65  | 92.86 |       | Ref   | -            | -     |
|                          | Portion and Food           | 4  | 6.9   | 54  | 93.1  |       | 0.963 | 0.246-3.765  | 0.957 |
| Carne cStreet            | No                         | 9  | 8.04  | 103 | 91.96 | 0.943 | Ref   | -            | -     |
|                          | Yes                        | 1  | 4.76  | 20  | 95.24 |       | 0.572 | 0.069-4.771  | 0.602 |
| Water                    | Supply network/Free access | 10 | 7.52  | 123 | 92.48 |       |       |              |       |
| Bleeding                 | No                         | 9  | 7.56  | 110 | 92.44 | 1     | Ref   | -            | -     |
|                          | Yes                        | 1  | 7.14  | 13  | 92.86 |       | 0.940 | 0.110-8.027  | 0.955 |
|                          | Anus                       | 0  | 0     | 1   | 100   | 0.723 |       |              |       |
| Local                    | Mouth                      | 0  | 0     | 2   | 100   |       |       |              |       |
|                          | Head                       | 0  | 0     | 1   | 100   |       |       |              |       |

|                   |                       |    |       |     |       |       |       |              |       |
|-------------------|-----------------------|----|-------|-----|-------|-------|-------|--------------|-------|
|                   | Back                  | 0  | 0     | 1   | 100   |       |       |              |       |
|                   | Feces                 | 0  | 0     | 3   | 100   |       |       |              |       |
|                   | Genital               | 1  | 50    | 1   | 50    |       |       |              |       |
|                   | Not informed          | 0  | 0     | 2   | 100   |       |       |              |       |
|                   | There was no bleeding | 9  | 7.56  | 110 | 92.44 |       |       |              |       |
|                   | Ear                   | 0  | 0     | 1   | 100   |       |       |              |       |
|                   | Left hind paw         | 0  | 0     | 1   | 100   |       |       |              |       |
| Vomit             | No                    | 7  | 6.67  | 98  | 93.33 | 0.75  | Ref   | -            | -     |
|                   | Yes                   | 3  | 10.71 | 25  | 89.29 |       | 1.68  | 0.405-6.964  | 0.470 |
| Diarrhea          | No                    | 10 | 8.06  | 114 | 91.94 | 0.817 | Ref   | -            | -     |
|                   | Yes                   | 0  | 0     | 9   | 100   |       | 0.000 | -            | 0.376 |
| Slimming          | No                    | 10 | 8.13  | 113 | 91.87 | 0.753 | Ref   | -            | -     |
|                   | Yes                   | 0  | 0     | 10  | 100   |       | 0     | -            | 0.348 |
| Tick season       | Whole year            | 2  | 12.50 | 14  | 87.50 | 0.392 | 1     | 0.123-8.128  | 1     |
|                   | Don't know            | 1  | 20.00 | 4   | 80.00 |       | 1.75  | 0.124-24.650 | 0.676 |
|                   | Autumn + Winter       | 2  | 12.50 | 14  | 87.50 |       | Ref   | -            | -     |
|                   | Spring + Summer       | 5  | 5.21  | 91  | 94.79 |       | 0.385 | 0.068-2.177  | 0.265 |
| Control Ticks     | No                    | 1  | 2.94  | 33  | 97.06 | 0.426 | Ref   | -            | -     |
|                   | Yes                   | 9  | 9.09  | 90  | 90.91 |       | 3.3   | 0.402-27.060 | 0.241 |
| Presence of fleas | No                    | 5  | 6.25  | 75  | 93.75 | 0.729 | Ref   | -            | -     |
|                   | Yes                   | 5  | 9.43  | 48  | 90.57 |       | 1.563 | 0.429-5.684  | 0.495 |
| Flea control      | No                    | 8  | 8.25  | 89  | 91.75 | 0.743 | Ref   | -            | -     |
|                   | Yes                   | 2  | 6.67  | 28  | 93.33 |       | 0     | -            | 0.464 |
|                   | Don't know            | 0  | 0     | 6   | 100   |       | 0.795 | 0.159-3.962  | 0.779 |
|                   | Both                  | 4  | 7.14  | 52  | 92.86 | 0.751 | 0.577 | 0.134-2.477  | 0.455 |
| Vaccination       | Anti-rabies           | 2  | 6.45  | 29  | 93.55 |       | 0.517 | 0.088-3.044  | 0.460 |
|                   | Polyvalent            | 0  | 0     | 6   | 100   |       | 0     | -            | 0.376 |
|                   | None                  | 4  | 11.76 | 30  | 88.24 |       | Ref   | -            | -     |

|                    |            |    |       |    |       |       |       |             |       |
|--------------------|------------|----|-------|----|-------|-------|-------|-------------|-------|
| Vaccination Annual | Don't know | 0  | 0     | 6  | 100   |       | 0     | -           | 0.376 |
|                    | No         | 6  | 7.89  | 70 | 92.11 | 0.947 | Ref   | -           | -     |
|                    | Yes        | 4  | 7.14  | 52 | 92.86 |       | 0.897 | 0.241-3.343 | 0.872 |
| Deworming          | Don't know | 0  | 0     | 1  | 100   |       | 0.000 | -           | 0.770 |
|                    | No         | 3  | 7.89  | 35 | 92.11 | 0.956 | Ref   | -           | -     |
|                    | Yes        | 7  | 7.45  | 87 | 92.55 |       | 0.939 | 0.230-3.838 | 0.930 |
| Frequency          | Don't know | 0  | 0     | 1  | 100   |       | 0     | -           | 0.770 |
|                    | 1 time     | 1  | 3.23  | 30 | 96.77 | 0.696 | -     | -           | 0.630 |
|                    | 2 times    | 1  | 25    | 3  | 75    |       | -     | -           | 0.165 |
|                    | 3 times    | 0  | 0     | 3  | 100   |       | -     | -           |       |
|                    | Yearly     | 3  | 8.33  | 33 | 91.67 |       | -     | -           | 0.428 |
|                    | Never      | 3  | 10.71 | 25 | 89.29 |       | -     | -           | 0.365 |
|                    | No         | 0  | 0     | 7  | 100   |       | Ref   | -           | -     |
| Animal Hygiene     | Don't know | 2  | 8.33  | 22 | 91.67 |       | -     | -           | 0.430 |
|                    | Clean      | 10 | 11.9  | 74 | 88.1  | 0.030 | Ref   | -           | -     |
|                    | Dirty      | 0  | 0     | 49 | 100   |       | 0     | -           | 0.012 |

\* Chi Square Test

Table S5. Multiple logistic regression models by the stepwise method of input and output of dog variables.

| Variable                        | Model 1 | Model 2 | Model 3 | Model 4 | Model 5 |
|---------------------------------|---------|---------|---------|---------|---------|
|                                 | p-value | p-value | p-value | p-value | p-value |
| Intercept)                      | 0.027   | 0.027   | 0.014   | 0.005   | 0.003   |
| Size: Average                   | 0.248   | 0.253   |         |         |         |
| Size: Small                     | 0.936   | 0.959   |         |         |         |
| Tick collection on the dog: yes | 0.853   |         |         |         |         |
| Tick collection sites: Both     | 0.994   | 0.994   | 0.995   | 0.995   | 0.995   |
| Tick collection sites: Dog      | 0.997   | 0.997   | 0.997   | 0.997   | 0.996   |

---

|                               |       |       |       |       |       |
|-------------------------------|-------|-------|-------|-------|-------|
| No tick collection            | 0.105 | 0.107 | 0.049 | 0.034 | 0.021 |
| Other animals: yes            | 0.264 | 0.270 | 0.350 |       |       |
| Enter the house: yes          | 0.077 | 0.078 | 0.077 | 0.070 | 0.059 |
| Visualization of rodents: yes | 0.295 | 0.300 | 0.313 | 0.292 |       |

---
